# Supplementary material for: Structural similarities in Cs(16)-C86 and C2(17)-C86
Source: Royal Society of Chemistry journal article supplement (doi:10.1039/c0cc00697a), 2010-01-01
Supplement: c0cc00697a.pdf [file c0cc00697a.pdf]

Supporting information for

## Structural Similarities in $C_s(16)-C_{86}$ and $C_2(17)-C_{86}^\dagger$

Zhimin Wang,<sup>a,b</sup> Hua Yang,<sup>a</sup> An Jiang,<sup>a</sup> Ziyang Liu,<sup>a\*</sup> Marilyn M. Olmstead,<sup>b\*</sup>  
and Alan L. Balch<sup>b\*</sup>

<sup>a</sup> Department of Chemistry, Zhejiang University, Hangzhou 310027 (China) Fax: (+86) 571-8795-1895 E-mail: zyliu@zju.edu.cn

<sup>b</sup> College of Biology and Environment Engineering, Zhejiang Shuren University, Hangzhou 310015, China

<sup>c</sup> Department of Chemistry, University of California, One Shields Avenue, Davis, CA, 95616. U. S. A. E-mail: mmolmstead@ucdavis.edu; albalch@ucdavis.edu; Fax +1 (530) 752 2820; Tel +1 (530) 752 0941

### Experimental and computation section

**Synthesis of  $C_{86}$ .** The  $8 \times 150$  mm graphite rods were core-drilled (6.0 mm diameter), and were packed with a mixture of  $Sm_2O_3$  and graphite powder with atomic ratio of 1:40. The packed rods were preheated at about  $800^\circ C$  under a dinitrogen atmosphere for 12 hours. The rods were then vaporized in a Krätschmer-Huffman arc-discharge generator with pressure of 200 torr.<sup>1</sup> The discharging electric current and voltage were 80 A and 30 V, respectively. The raw soot was collected and extracted repeatedly with *o*-dichlorobenzene with ultrasonication until the extract was colorless, without special nitrogen protection. After removing the solvent with a rotary evaporator, chlorobenzene was added to redissolve the dry powder.

**HPLC separation of  $C_{86}$ .** The extract was subjected to a four-stage HPLC isolation process that did not involve recycling. The first-stage of chromatography was carried out on a Buckyprep-M column with chlorobenzene eluent, and the eluent from 9.0 to 10.5 minutes was collected as F1 (dashed portion). F1 was subjected to the second-stage separation utilizing a Buckyprep column with toluene eluent, and F2 was collected. The third-stage isolation for F2 was performed on a 5PBB column with toluene eluent, the dashed part located between two main peaks was collected as F3, which was condensed and re-injected into the same column in order to get rid of both the front and the rear impurities. All the columns used were  $10 \times 250$  mm (Nacalai Tesque).

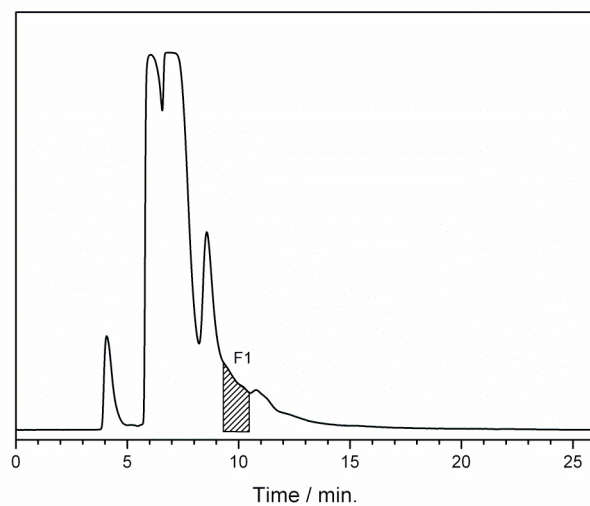

**Fig S-1** The first-stage HPLC separation of raw extract on Buckyprep-M column with chlorobenzene as eluent at flow rate 4.5 mL/min and detecting wavelength 450 nm. Dashed area was collected as F1.

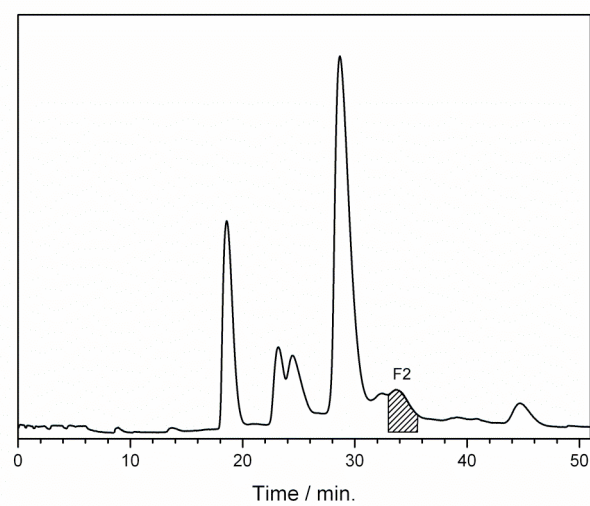

**Fig. S-2** The second-stage HPLC profile of F1 on Buckyprep column with toluene as eluent at flow rate 4.5 mL/min and detecting wavelength 450 nm. Dashed area was collected as F2.

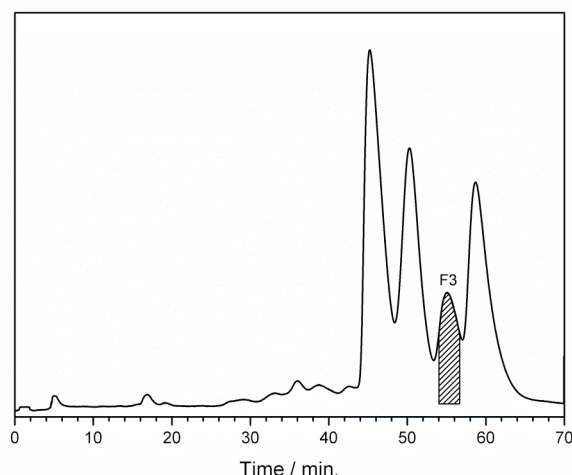

**Fig. S-3** The third-stage HPLC profile of F1-1 on 5PBB column with toluene as eluent at flow rate 4.5 mL/min and detecting wavelength 450 nm. Dashed area was collected as F3, which contains the C<sub>86</sub>.

**Computational Details.** All computations were at density function theory (DFT) level. Geometries of C86(16)-Cs were fully optimized by the PBEPBE function<sup>2</sup> with split-valence *d*-polarized 3-21G(d) basis set. All calculations were carried out with the GAUSSIAN 03 program.<sup>3</sup>

#### References

- 1 Sun, D.-Y.; Liu, Z.-Y.; Guo, X.-H.; Xu, W.-G.; Liu, S.-Y. *J. Phys. Chem. B* 1997, **101**, 3927-3930.
- 2 a) Becke, A. D. *Phys. Rev. A*, 1988, **38**, 3098-3100; b) Lee, C.; Yang, W.; Parr, R. G. *Phys. Rev. B*, 1988, **37**, 785-789.
- 3 Gaussian 03, Revision C.02. Frisch, M. J.; Trucks, G. W.; Schlegel, H. B.; Scuseria, G. E.; Robb, M. A.; Cheeseman, J. R.; Montgomery, Jr., J. A.; Vreven, T.; Kudin, K. N.; Burant, J. C.; Millam, J. M.; Iyengar, S. S.; Tomasi, J.; Barone, V.; Mennucci, B.; Cossi, M.; Scalmani, G.; Rega, N.; Petersson, G. A.; Nakatsuji, H.; Hada, M.; Ehara, M.; Toyota, K.; Fukuda, R.; Hasegawa, J.; Ishida, M.; Nakajima, T.; Honda, Y.; Kitao, O.; Nakai, H.; Klene, M.; Li, X.; Knox, J. E.; Hratchian, H. P.; Cross, J. B.; Bakken, V.; Adamo, C.; Jaramillo, J.; Gomperts, R.; Stratmann, R. E.; Yazyev, O.; Austin, A. J.; Cammi, R.; Pomelli, C.; Ochterski, J. W.; Ayala, P. Y.; Morokuma, K.; Voth, G. A.; Salvador, P.; Dannenberg, J. J.; Zakrzewski, V. G.; Dapprich, S.; Daniels, A. D.; Strain, M. C.; Farkas, O.; Malick, D. K.; Rabuck, A. D.; Raghavachari, K.; Foresman, J. B.; Ortiz, J. V.; Cui, Q.; Baboul, A. G.; Clifford, S.; Cioslowski, J.; Stefanov, B. B.; Liu, G.; Liashenko, A.; Piskorz, P.; Komaromi, I.; Martin, R. L.; Fox, D. J.; Keith, T.; Al-Laham, M. A.; Peng, C. Y.; Nanayakkara, A.; Challacombe, M.; Gill, P. M. W.; Johnson, B.; Chen, W.; Wong, M. W.; Gonzalez, C.; and Pople, J. A.; Gaussian, Inc., Wallingford CT, 2004

## Figures

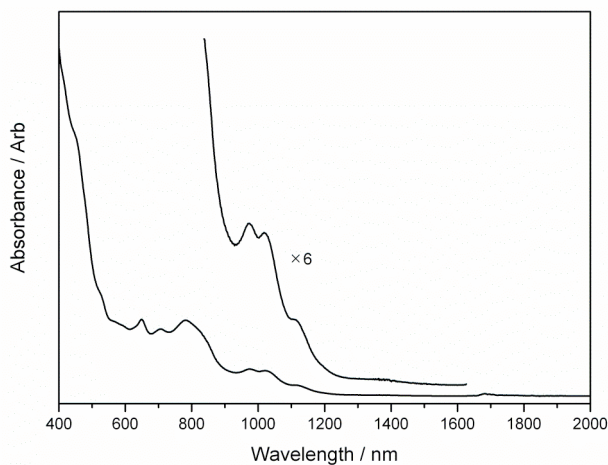

**Fig. S-4** UV-Vis-NIR absorption spectrum of the isolated C<sub>86</sub> in carbon disulfide

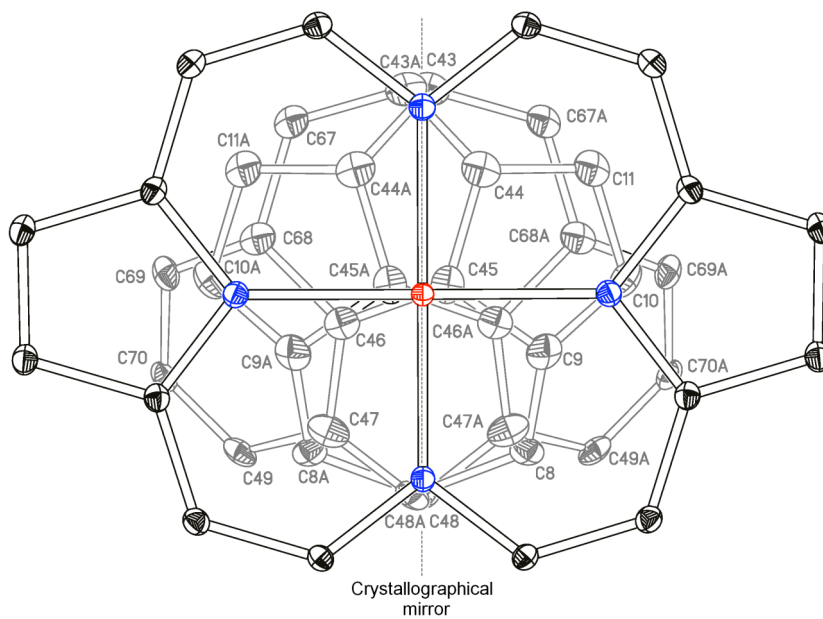

**Fig. S-5** Orientation of two positions of C<sub>86</sub> with respect to porphyrin plane in C<sub>86</sub> + Ni<sup>II</sup>(OEP) system.  
For clarity, only partial atoms of the fullerene are shown. The crystallographical mirror is perpendicular to the paper.

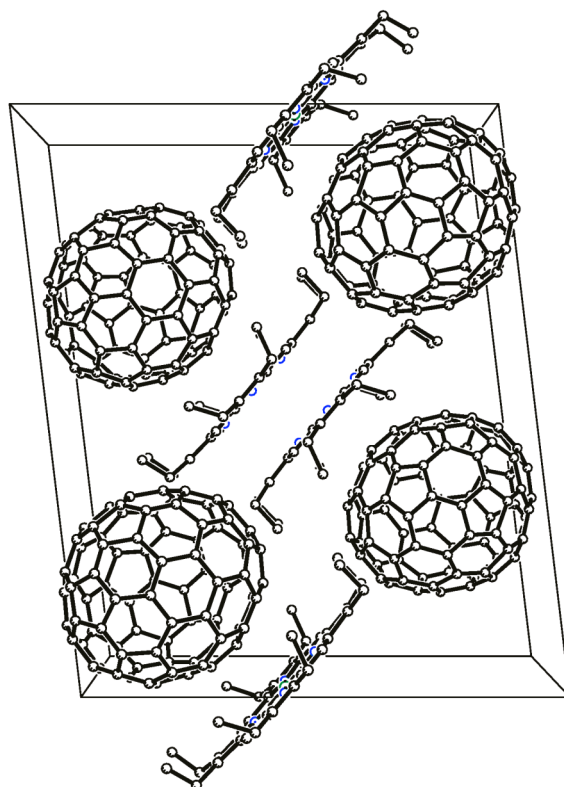

**Fig S-6** A perspective view of the packing in  $[C_{86}\bullet Ni^{II}(OEP)\bullet 2C_6H_5CH_3]$  with atoms denoted by uniform circles of arbitrary size. For clarity, the hydrogen atoms and toluene solvents are not shown.

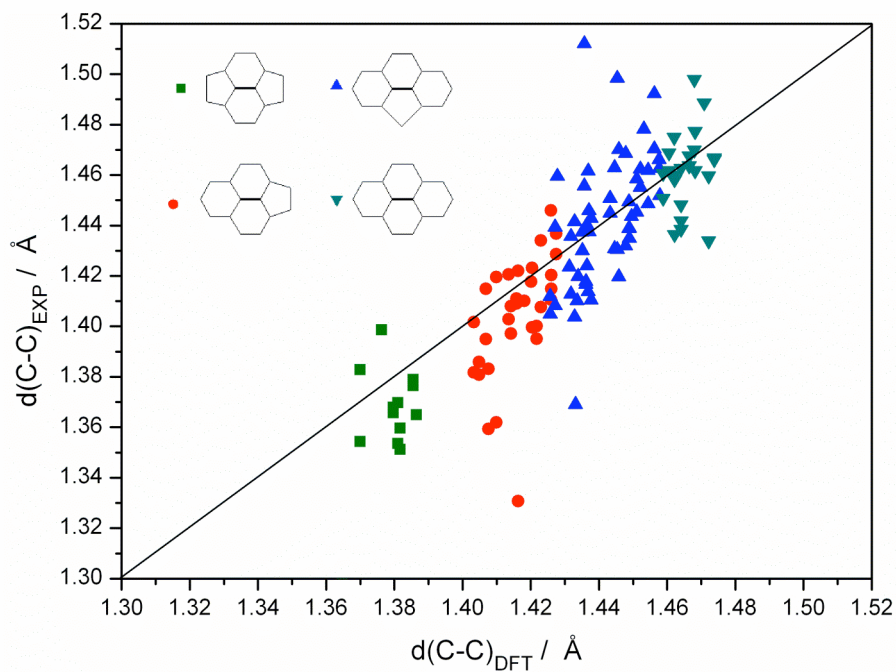

**Fig. S-7** Correlation between the experimentally obtained and the DFT calculated C—C bond distances in  $C_5(16)-C_{86}$ . Correlation between the C—C bond length and the type of fragment in which the corresponding bonds are involved (the bonds under consideration are shown in bold)

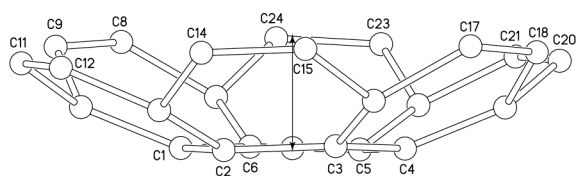

Coronene motif, 1.25 Å depth

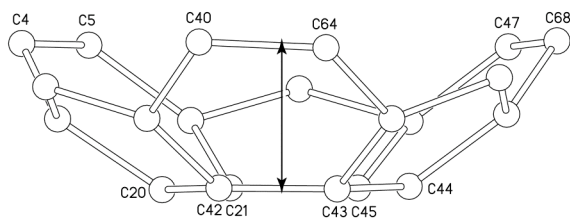

Sumanene motif, 1.66 Å average depth

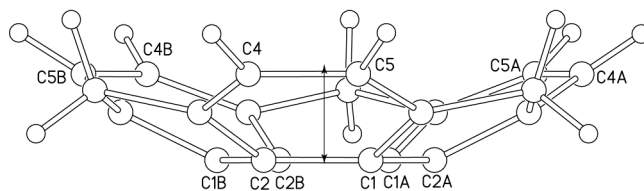

Sumanane, 1.11 Å depth

**Fig. S-8.** A comparison of the bowl depth of the coronene and sumanene motifs in the structure of  $C_5(16)C_{86}$ . A comparison is made to the structure of sumanene,  $C_{21}H_{12}$ .
